# Supplementary material for: Chronic Obstructive Pulmonary Disease (COPD) as a disease of early aging: Evidence from the EpiChron Cohort
Source: PubMed Central journal article supplement (PMC5823454; doi:10.1371/journal.pone.0193143), 2018-02-22
Supplement: pone.0193143.s004.pdf [file pone.0193143.s004.pdf]

Comorbidities prevalence comparison between COPD and Non-COPD patients

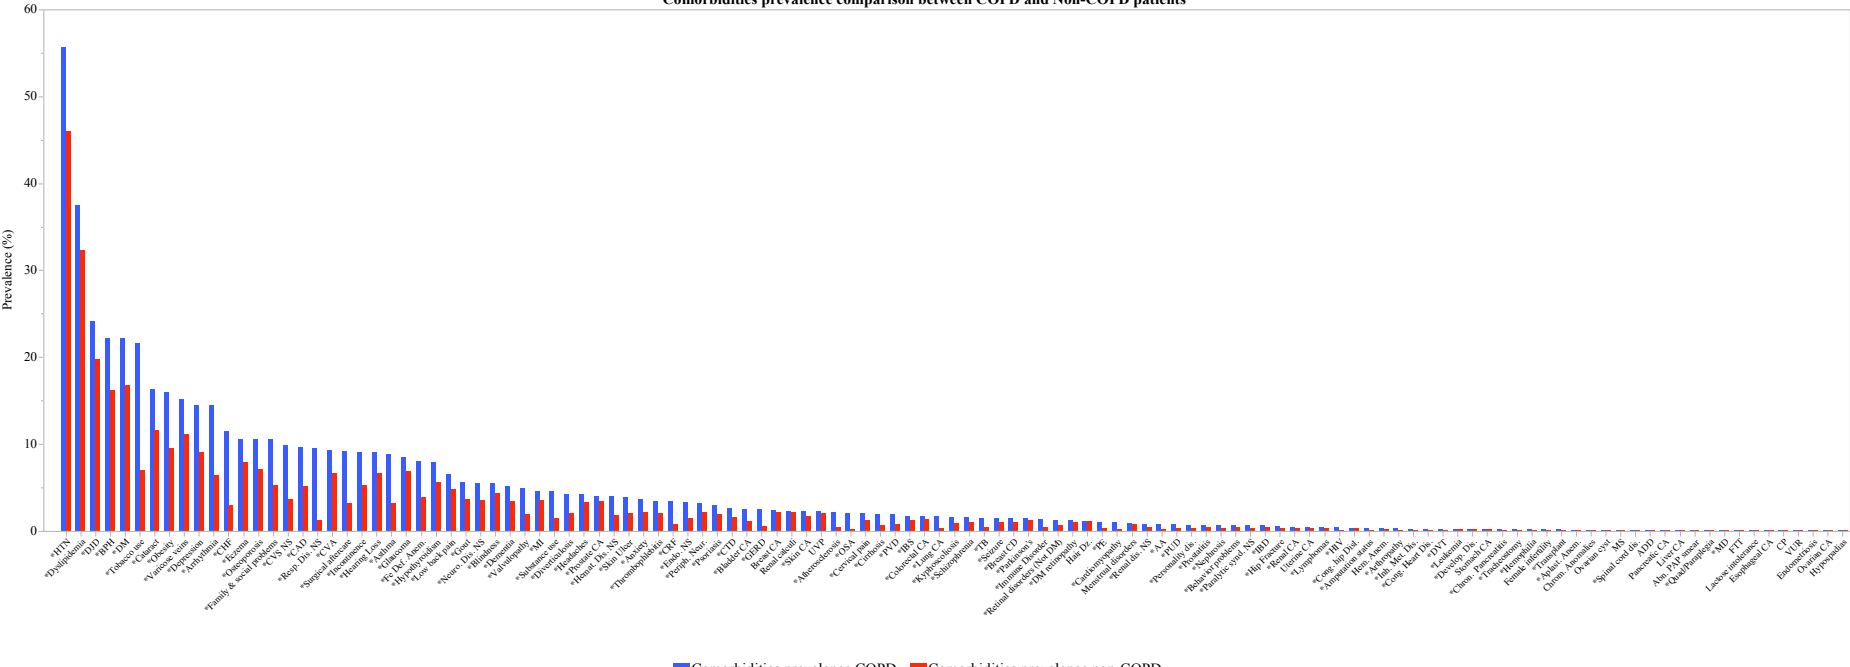

Comorbidities prevalence COPD Comorbidities prevalence non-COPD
