# Supplementary material for: Chronic Obstructive Pulmonary Disease (COPD) as a disease of early aging: Evidence from the EpiChron Cohort
Source: PubMed Central journal article supplement (PMC5823454; doi:10.1371/journal.pone.0193143), 2018-02-22

## Non-COPD Cohort

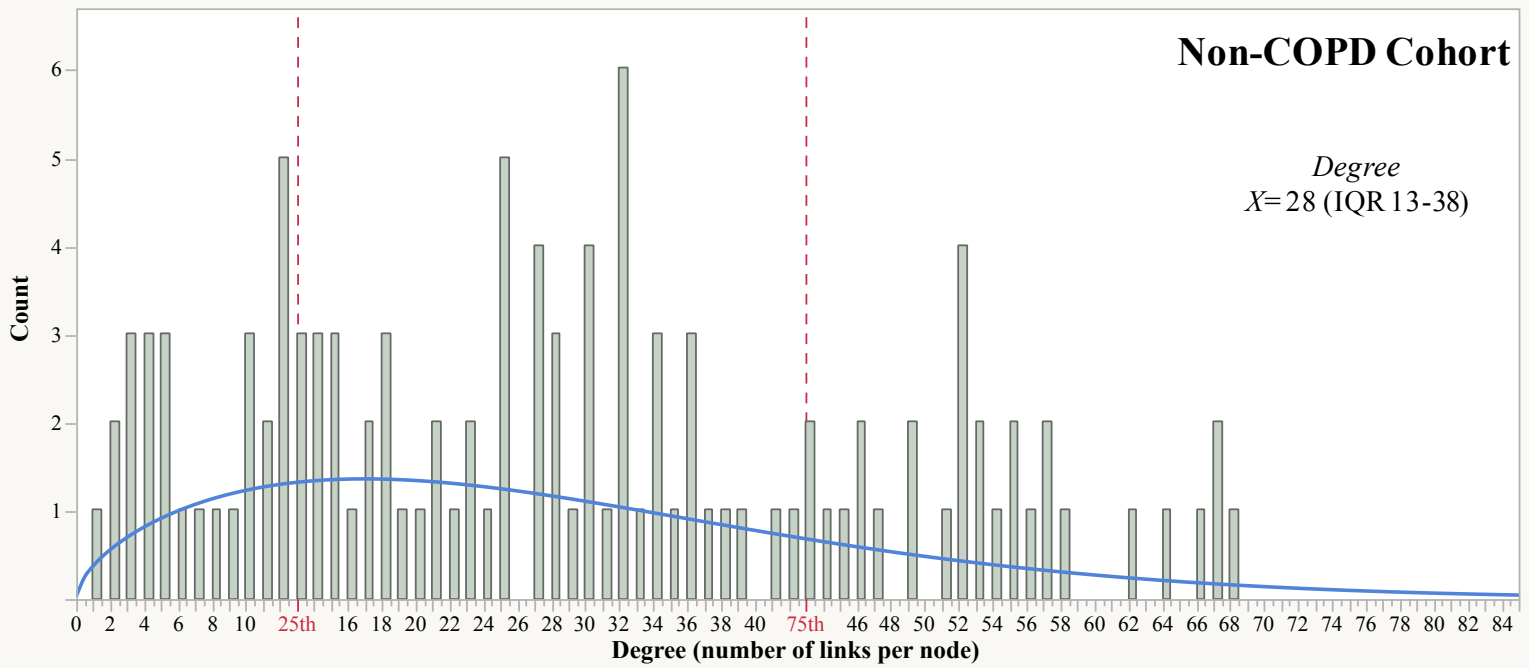

## COPD Cohort

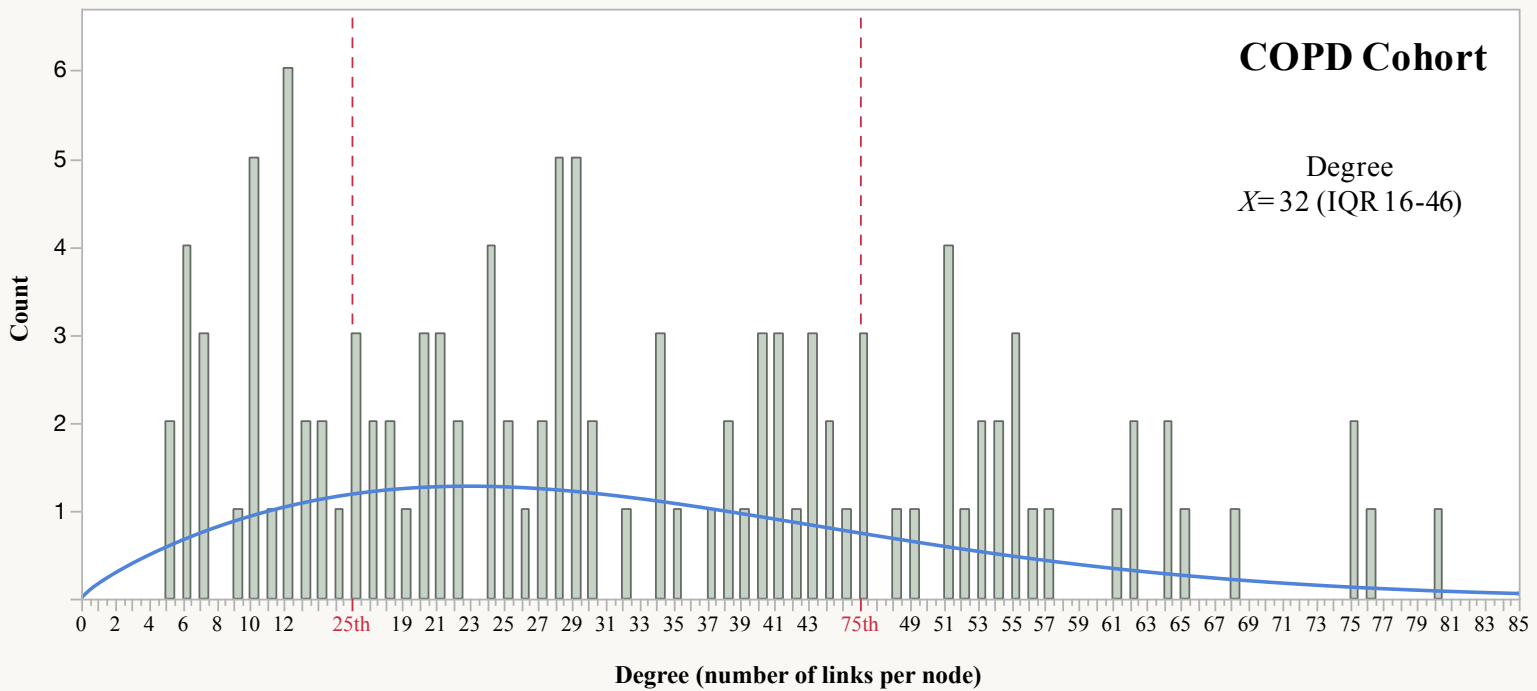

Supplement: pone.0193143.s006.pdf [file pone.0193143.s006.pdf]
